# Supplementary material
Source: PubMed Central journal article supplement (PMC5116751)

# Supplementary Figure 1. Gene Map of CpG Island Shore Site analyzed in *NR3C1*

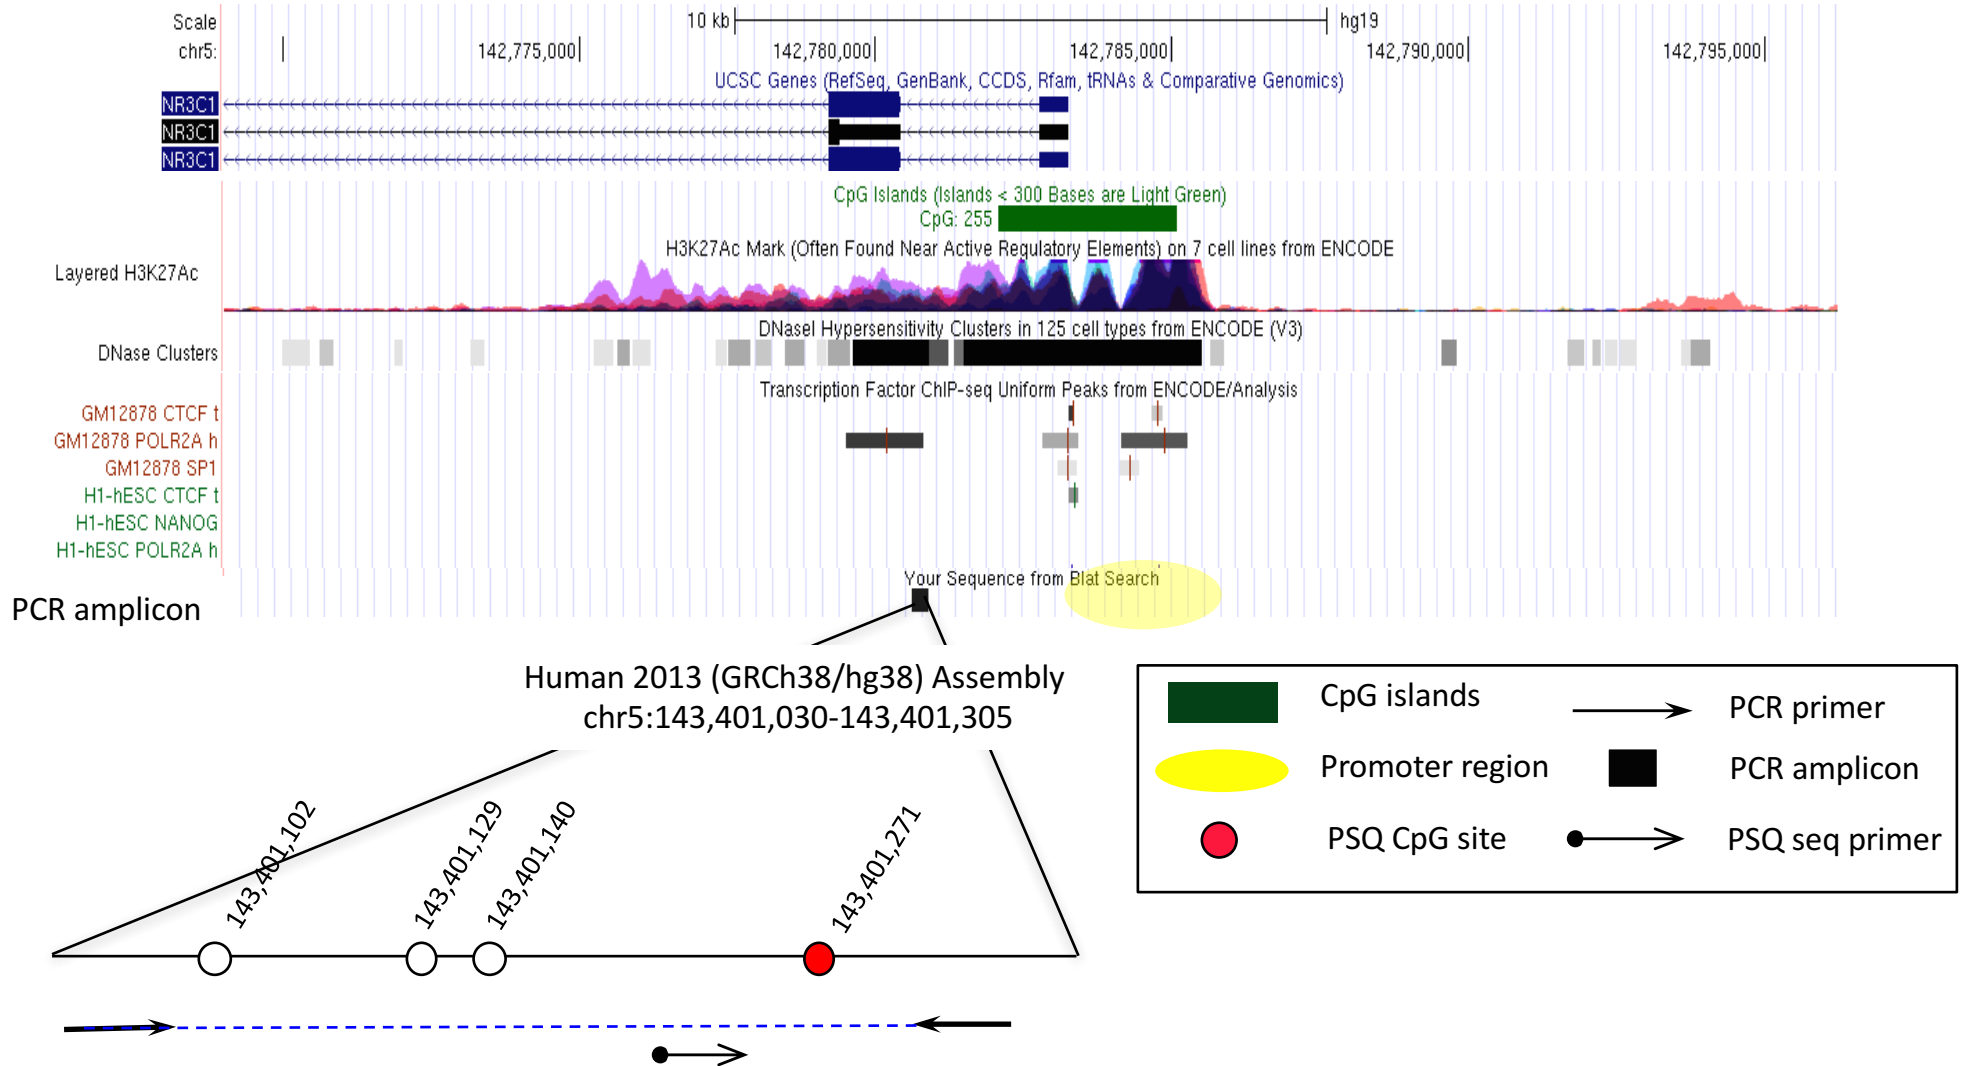

Supplement: epi-08-1507-s2.pdf [file epi-08-1507-s2.pdf]
